# HIV-1 gp120 Induces Expression of IL-6 through a Nuclear Factor-Kappa B-Dependent Mechanism: Suppression by gp120 Specific Small Interfering RNA

Ankit Shah<sup>1</sup>, Ashish S. Verma<sup>1#a</sup>, Kalpeshkumar H. Patel<sup>1</sup>, Richard Noel<sup>2</sup>, Vanessa Rivera-Amill<sup>2</sup>, Peter S. Silverstein<sup>1</sup>, Suman Chaudhary<sup>2#b</sup>, Hari K. Bhat<sup>1</sup>, Leonidas Stamatatos<sup>3</sup>, Dharendra P. Singh<sup>4</sup>, Shilpa Buch<sup>4</sup>, Anil Kumar<sup>1\*</sup>

**1** Division of Pharmacology, School of Pharmacy, University of Missouri-Kansas City, Kansas City, Missouri, United States of America, **2** Ponce School of Medicine, Ponce, Puerto Rico, **3** Seattle Biomedical Research Institute, Seattle, Washington, United States of America, **4** University of Nebraska Medical Center, Omaha, Nebraska, United States of America

## Abstract

In addition to its role in virus entry, HIV-1 gp120 has also been implicated in HIV-associated neurocognitive disorders. However, the mechanism(s) responsible for gp120-mediated neuroinflammation remain undefined. In view of increased levels of IL-6 in HIV-positive individuals with neurological manifestations, we sought to address whether gp120 is involved in IL-6 over-expression in astrocytes. Transfection of a human astrocyte cell line with a plasmid encoding gp120 resulted in increased expression of IL-6 at the levels of mRNA and protein by  $51.3 \pm 2.1$  and  $11.6 \pm 2.2$  fold respectively; this effect of gp120 on IL-6 expression was also demonstrated using primary human fetal astrocytes. A similar effect on IL-6 expression was observed when primary astrocytes were treated with gp120 protein derived from different strains of X4 and R5 tropic HIV-1. The induction of IL-6 could be abrogated by use of gp120-specific siRNA. Furthermore, this study showed that the NF- $\kappa$ B pathway is involved in gp120-mediated IL-6 over-expression, as IKK-2 and IKK $\beta$  inhibitors inhibited IL-6 expression by 56.5% and 60.8%, respectively. These results were also confirmed through the use of NF- $\kappa$ B specific siRNA. We also showed that gp120 could increase the phosphorylation of I $\kappa$ B $\alpha$ . Furthermore, gp120 transfection in the SVGA cells increased translocation of NF- $\kappa$ B from cytoplasm to nucleus. These results demonstrate that HIV-1 gp120-mediated over-expression of IL-6 in astrocytes is one mechanism responsible for neuroinflammation in HIV-infected individuals and this is mediated by the NF- $\kappa$ B pathway.

**Citation:** Shah A, Verma AS, Patel KH, Noel R, Rivera-Amill V, et al. (2011) HIV-1 gp120 Induces Expression of IL-6 through a Nuclear Factor-Kappa B-Dependent Mechanism: Suppression by gp120 Specific Small Interfering RNA. PLoS ONE 6(6): e21261. doi:10.1371/journal.pone.0021261

**Editor:** Xia Jin, University of Rochester, United States of America

**Received:** December 21, 2010; **Accepted:** May 25, 2011; **Published:** June 21, 2011

**Copyright:** © 2011 Shah et al. This is an open-access article distributed under the terms of the Creative Commons Attribution License, which permits unrestricted use, distribution, and reproduction in any medium, provided the original author and source are credited.

**Funding:** This work was supported by National Institute on Drug Abuse grants DA025528 and DA025011 to AK. The funders had no role in study design, data collection and analysis, decision to publish, or preparation of the manuscript.

**Competing Interests:** The authors have declared that no competing interests exist.

\* E-mail: kumaran@umkc.edu

#a Current address: Amity Institute of Biotechnology, Amity University, Noida, India

#b Current address: Stowers Institute for Medical Research, Kansas City, Missouri, United States of America

## Introduction

Highly active anti-retroviral therapy has significantly reduced the incidence of HIV-associated dementia (HAD). However, HIV-associated neurocognitive disorders (HAND) remain a major problem in people infected with HIV-1. Although the pathogenic mechanisms responsible for HAND are uncertain, astrocytes are thought to play a major role in the disorder. Astrocytes are the most abundant cell type found in the neuroectodermal region and have been shown to be associated with various pathological abnormalities of the brain such as increased glutamate uptake, hypoxia, increased oxidative stress and disruption of blood-brain barrier integrity [1]. Astroglia has been reported in the brains of patients with HAD [2]. Astrocytes undergo activation in response to disorders in the CNS that involve injury and inflammation, including cerebral ischemia [3], multiple sclerosis [4], Alzheimer's disease [5], and human immunodeficiency virus type 1 encephalitis (HIVE) [6]. Li et al. showed that the intact HIV-1 virion can

alter the expression of various cytokines in human fetal astrocytes [2]. Viral proteins, such as Tat and gp120, have been implicated in pathways that involve direct as well as indirect toxicities to glial cells of the CNS, including astrocytes [7,8,9]. HIV-1 gp120 is a surface glycoprotein, which not only enables viral attachment and entry into the host cells, but has also been found to be involved in neurotoxicity [10,11]. The mechanism of gp120-mediated neurotoxicity is known to involve oxidative stress [12,13,14] and induction of IL-1 $\beta$  production by glial cells [15]. Ronaldson et al. showed that gp120 plays a role in regulating transporter expression in rat astrocytes, presumably through the action of inflammatory mediators such as TNF- $\alpha$ , IL-1 $\beta$ , and IL-6 [16].

IL-6 is an activator of acute phase responses and is involved in crosstalk with other inflammatory mediators [17,18]. IL-6-mediated inflammation is known to cause a higher incidence of gliosis and dendritic damage in patients with Parkinson's disease (PD), amyotrophic lateral sclerosis [10], multiple sclerosis [17] and Alzheimer Disease [19] [20,21]. Furthermore, increased IL-6 and

IL-8 levels have also been reported in HIV-1 infected patients, suggesting a possible link between cytokine levels and neuroAIDS [22]. Using mixed cultures of primary brain cells Yueng et al. demonstrated an increased expression of IL-6 in response to gp120 [23]. Another study by Kong et al. also demonstrated that gp120 could induce IL-6 in murine primary mixed glial cell cultures [24]. While cell culture models have demonstrated the induction of IL-6 along with other cytokines such as TNF- $\alpha$  and IL-1 $\beta$  a central role for IL-6 in gp120-induced neuroinflammation has been demonstrated using a rat model [25]. In this case, intrathecal administration of gp120 was shown to induce the expression of IL-6, TNF- $\alpha$ , and IL-1 $\beta$ . However, of critical importance is that treatment of the animals with antibody to IL-6 abrogated the expression of the other cytokines [25]. This suggests that IL-6 is capable of regulating other cytokines that are involved in mediating neuroinflammation.

Thus, determination of the mechanisms responsible for the gp120-mediated increase in IL-6 expression in astrocytes could provide information crucial for the treatment of neuroinflammation. To answer these questions we used a human astrocyte cell line, SVGA, to determine the effect of gp120 on IL-6 expression at the RNA and protein levels. Furthermore, these effects were confirmed in primary human fetal astrocytes by exposing these cells to gp120 protein. We also determined whether NF- $\kappa$ B inhibitors or siRNAs targeted towards either gp120 or NF- $\kappa$ B could block IL-6 upregulation by gp120.

## Results

### HIVgp120 induces a time-dependent IL-6 up-regulation

We first wanted to confirm that human astrocytes are a potential source of gp120-mediated IL-6 over-expression. SVGA cells were transfected with a gp120-expressing plasmid. Our transfection efficiency ranged between 55–75% as shown demonstrated by transfection of a plasmid encoding green fluorescent protein followed by flow cytometric analyses (data not shown). IL-6 mRNA was up-regulated and reached a peak level ( $51.3 \pm 2.1$  fold) at 6 hours after transfection (Fig. 1A). IL-6 mRNA expression diminished from this peak level and was found to be  $33.8 \pm 1.1$ ,  $12.3 \pm 2.4$ ,  $3.6 \pm 0.4$  and  $2.7 \pm 0.4$  fold higher than in empty vector-

transfected mock controls after 12, 24, 48 and 72 hour post-transfection, respectively (Figure 1A). We also quantified IL-6 protein concentrations at these time points. IL-6 protein was observed to be at significantly elevated levels as early as 6 hours post-transfection in supernatants of gp120-transfected cells compared to that in mock-transfected controls ( $3.418 \pm 0.708$  vs  $0.370 \pm 0.068$  ng/ml) (Figure 1B). The IL-6 concentration increased in both control and gp120-transfected cells over time but gp120-transfected cells showed significantly elevated levels compared to the control. The IL-6 concentration was 4.8 to 11.6 fold-higher in gp120-transfected cells compared to those in control wells (Figure 1B). Previous studies have reported that astrocytes express the CXCR4 chemokine receptor [26,27]. Therefore, gp120IIIIB which can bind to CXCR4 was used in this study in order to determine the effect of exogenous gp120 upon astrocytes. SVGA cells were treated with 20 nM gp120IIIIB. Increased levels of IL-6 expression were found as soon as 1 hour, and these levels gradually declined over the next 5 hours (Figure 1C).

To confirm the induction of IL-6 expression in response to gp120, human primary astrocytes obtained from 3 different donors were treated with 20 nM gp120IIIIB for various lengths of time that ranged from 30 min to 12 hours, after which mRNA and cell culture supernatants were collected. Expression levels of IL-6 mRNA peaked at 1 hour (Figure 2A) followed by a gradual decline, while protein expression in the supernatants peaked at 6 hours (Figure 2B). All donors used in this study showed similar kinetic patterns with different levels of induction ( $6.3 \pm 0.2$ ,  $8.4 \pm 0.3$ , and  $11.3 \pm 0.7$  fold peak mRNA expression). In order to determine whether the observed response was specific for gp120, astrocytes were treated with heat-inactivated gp120. IL-6 expression was not significantly different in the treatment with heat-inactivated gp120 compared to the untreated control (Fig. 2C). We also treated astrocytes with a gp120 protein-antibody complex, and this further confirmed the specificity of gp120 (Figure 2C) as the gp120-immune complex did not induce IL-6 expression.

In addition to CXCR4, gp120 can also bind to CCR5 as a co-receptor. Astrocytes have been reported to express CCR5 in addition to CXCR4 on their surface [28,29,30]. In order to determine the differential effect of various strains of gp120 based on its tropism, primary astrocytes were treated with 20 nM of

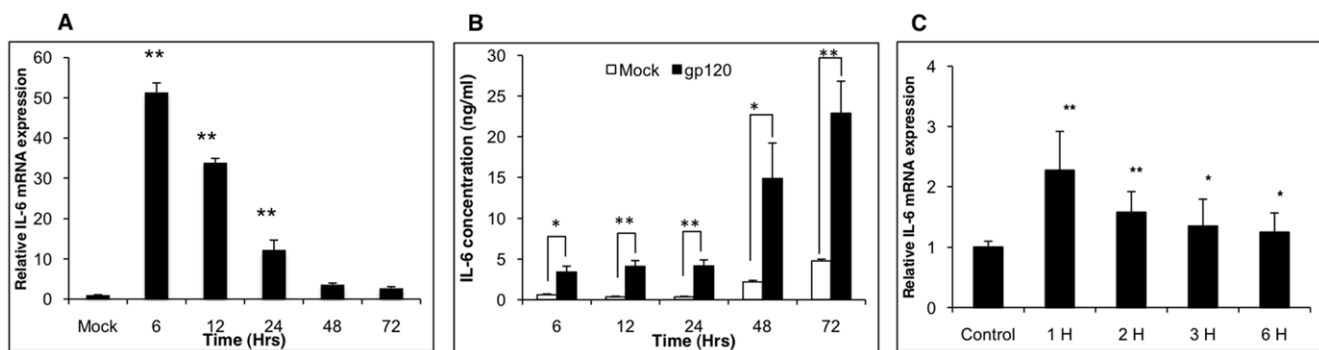

**Figure 1. gp120-mediated increase of IL-6 expression in SVGA astrocyte cells.**  $1 \times 10^6$  SVGA astrocytes were transfected with 1  $\mu$ g gp120 JR-FL (R5 tropic) DNA using Lipofectamine™ 2000. The cells were harvested at the times described in the text. Mock transfection was performed with transfection of equal amount of empty human vector pcDNA3.1. All times noted on the figure and listed in the text are the times at which cells and supernatants were harvested after the end of the 5 hour transfection protocol. IL-6 mRNA (A) and IL-6 protein (B) expression levels were measured using real time RT-PCR and bioplex assays respectively. In (B), open bars show empty-vector transfected mock controls and closed bars show gp120 transfected samples. (C) shows the effect of exogenous gp120 on SVGA cells. SVGA cells were exposed to 20 nM recombinant gp120IIIIB for various lengths of time and total mRNA was isolated. IL-6 expression levels were measured using real time RT-PCR. The mRNA levels are presented as fold difference between gp120 transfected cells and control cells transfected with empty plasmid. The protein concentration is presented as ng/ml protein in supernatant. Each bar represents mean  $\pm$  SE of 3 experiments with each experiment done in triplicates. The statistical significance was calculated using student's t test and \* and \*\* denotes p value of  $\leq 0.05$  and  $\leq 0.01$ , respectively. doi:10.1371/journal.pone.0021261.g001

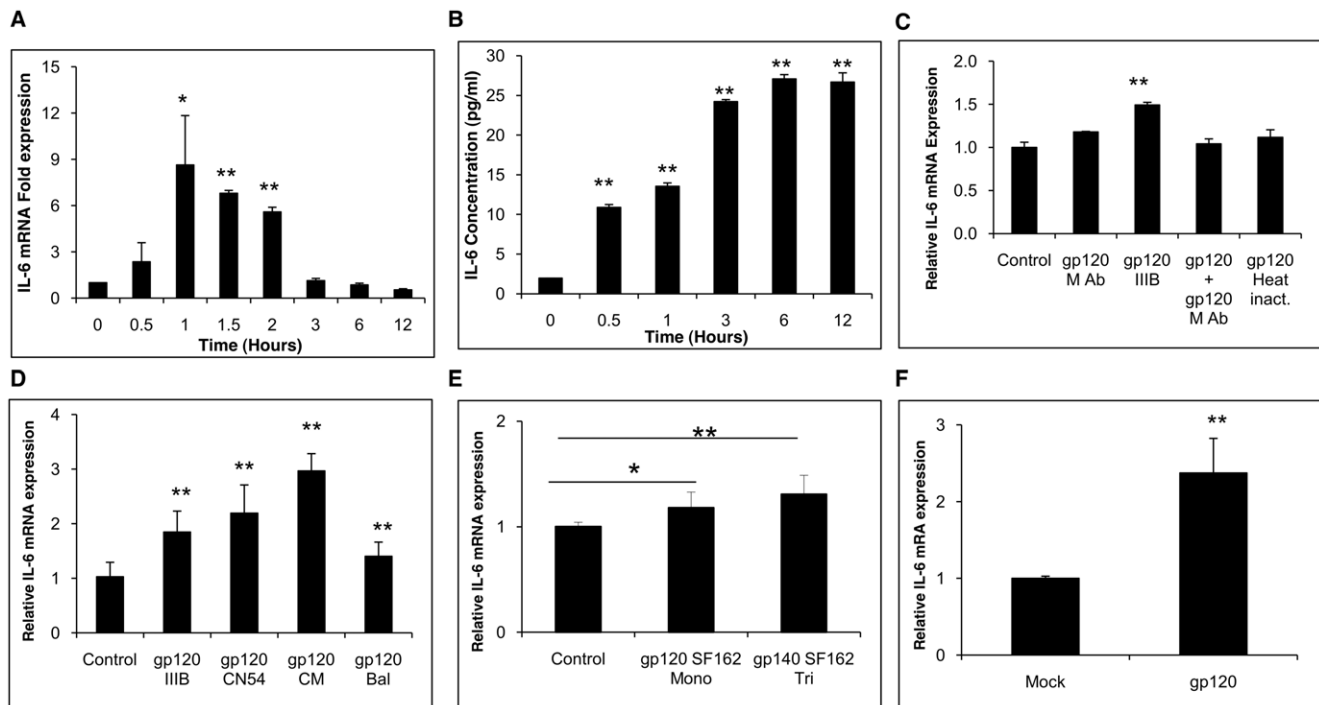

**Figure 2. gp120 mediated increased levels of IL-6 in primary human fetal astrocytes.**  $1 \times 10^6$  primary human fetal astrocytes from each of three different donors were treated with 20 nM gp120 IIIIB for specific lengths of time and the cells were harvested to obtain mRNA. The cell culture supernatants were collected at the times indicated and used to quantify the level of IL-6 protein expression using a Bio-Plex assay. Levels of IL-6 mRNA expression as measured by real-time RT-PCR peaked at 1 hour (A) and IL-6 protein expressions peaked at 6 hours (B). Monoclonal antibody for gp120 was used to negate the gp120 mediated response and thus served as another control. Heat inactivated gp120 was compared with untreated control to show gp120 specific IL-6 expression (C). Different strains of gp120 (D) and monomeric gp120 SF162 and trimeric gp140 SF162 (E) increased the levels of IL-6 differentially. Primary astrocytes from different donors were transfected with gp120 plasmid in order to compare the levels of IL-6 expression after 2 hours (D). Each bar represents mean  $\pm$  SE of 3 experiments with each experiment done in triplicates. The statistical significance was calculated using student's t test and \* and \*\* denotes p value of  $\leq 0.05$  and  $\leq 0.01$ , respectively. doi:10.1371/journal.pone.0021261.g002

either gp120 CN54, gp120 CM or gp120 Bal. gp120 CN54, CM and Bal strains are M-tropic strains and all showed over expression of IL-6 (Figure 2D) at variable levels ( $2.2 \pm 0.21$ ,  $3 \pm 0.13$  and  $1.4 \pm 0.11$  fold for gp120 CN54, CM and Bal respectively). Previous studies have shown that the trimeric form of gp120 elicited a potent neutralizing response as compared to monomeric gp120 [31], thus providing a better immunogen for vaccination. In order to determine the inflammatory response of astrocytes to both of the forms of gp120, we used monomeric and trimeric forms of the gp120 and gp140 from SF162 strain. Both monomeric and trimeric forms increased the expression of IL-6 ( $1.2 \pm 0.1$  and  $1.3 \pm 0.1$  fold respectively) (Figure 2E) to similar levels. Furthermore, in order to determine the effect of transfection on the primary astrocytes, a plasmid encoding gp120 was transfected using electroporation. The expression levels of IL-6 ( $2.38 \pm 0.44$  fold) in the transfected cells were comparable to those observed when gp120 was added exogenously (Figure 2F).

#### gp120 translocated NF- $\kappa$ B1 from cytoplasm to nucleus in astrocyte cells

We then wished to determine the signal transduction pathway involved in IL-6 induction. We examined the NF- $\kappa$ B pathway because its role in the induction of inflammatory cytokines, including IL-6, has been well documented [32,33,34]. Nuclear translocation of p50 and/or p65 (RelB) has been shown to be associated with NF- $\kappa$ B activation. SVGA cells were transfected with either the plasmid encoding gp120 or were mock-transfected. In comparing the cytoplasmic and nuclear fractions of the gp120-

transfected and mock-transfected cells, we observed that gp120-transfected cells showed 2.74 fold higher p50 translocation as compared to mock-transfected cells ( $p < 0.001$ ) (Figure 3). In mock transfected cells there was 1.76  $\pm$  0.03 fold difference between nuclear and cytosolic fractions, ( $p < 0.05$ ), whereas in gp120 transfected cells the difference was  $4.91 \pm 0.15$  fold ( $p < 0.001$ ).

#### gp120 activates NF- $\kappa$ B by inducing phosphorylation of I $\kappa$ B $\alpha$ in human fetal astrocytes

Inhibitory kappa B kinase is an enzyme that phosphorylates and releases I $\kappa$ B $\alpha$  from the p50/p65 heterodimer, thus yielding active NF- $\kappa$ B. Levels of p-I $\kappa$ B- $\alpha$  were measured to determine whether NF- $\kappa$ B activation plays a role in IL-6 induction. Primary astrocytes were treated with exogenous gp120 IIIIB and the levels of phosphorylated I $\kappa$ B- $\alpha$  were measured in whole cell lysates. Although the peak levels were observed at different times for the two donors, I $\kappa$ B- $\alpha$  showed a time-dependent increase in phosphorylation as compared to total I $\kappa$ B $\alpha$  in astrocytes from both the donors (Figure 4A & 4B). Peak levels of phosphorylated I $\kappa$ B- $\alpha$  were observed at 10 min (1.94 fold higher) for donor-1 and 30 min (2.52 fold higher) for donor-2.

#### Specific antagonists of NF- $\kappa$ B and siRNA targeted against NF- $\kappa$ B abrogated the gp120 mediated increase in IL-6 expression

We hypothesized that the gp120-mediated IL-6 increase in astrocytes may occur through the NF- $\kappa$ B pathway as this pathway

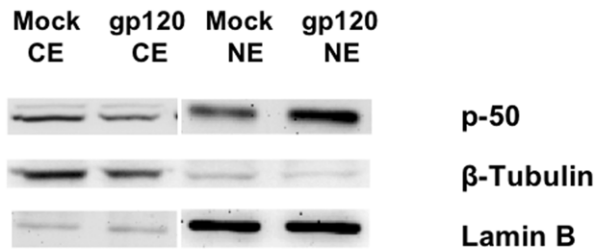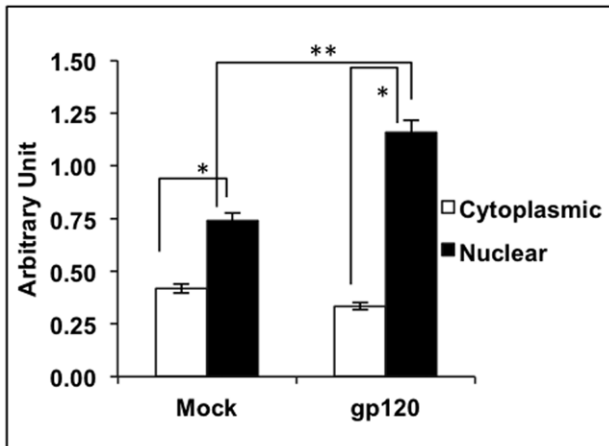

**Figure 3. Increased NF- $\kappa$ B-translocation in gp120-transfected astrocytes.** SVGA cells were either mock-transfected or were transfected with gp120 plasmid for a period of 6 hours followed by separation of cytosolic and nuclear fractions. These proteins were electrophoresed on 10% SDS gel and transferred to PVDF membrane. A representative western blot with lane-1 (mock-transfected SVGA cytosolic fraction), lane-2 (gp120-transfected SVGA cytosolic fraction), lane-3 (Mock-transfected SVGA nuclear fraction) and lane-4 (gp120-transfected SVGA nuclear fraction) is shown. The expression levels of p50 were normalized to their respective compartmental housekeeping genes (LaminB for nucleus and  $\beta$ -tubulin for cytoplasm) as loading controls. The bars, shown in the chart show normalized values of the band intensities for p50 over loading controls for appropriate compartments (LaminB for nucleus and  $\beta$ -tubulin for cytoplasm). The bar chart represents the means and SE of the ratios of p50 to the appropriate housekeeping gene (i.e. laminB for nuclear extracts and  $\beta$ -tubulin for cytoplasmic extracts). The means and SE values are from 3 independent experiments. The statistical significance was calculated using student's t test and \* and \*\* denotes p value of  $\leq 0.05$  and  $\leq 0.01$ , respectively. doi:10.1371/journal.pone.0021261.g003

has been shown to be involved in IL-6 induction. We tested this hypothesis by using two chemical inhibitors and two unique siRNAs targeted against NF- $\kappa$ B. SC514 inhibits NF- $\kappa$ B activation by targeting IKK-2 [35], whereas BAY11-7082 blocks NF- $\kappa$ B activation by inhibiting the TNF- $\alpha$ -induced phosphorylation of IKK $\beta$  [36]. SVGA astrocytes were treated with 10  $\mu$ M of either IKK-2 (SC514: IC<sub>50</sub> = 14.5  $\mu$ M) or IKK $\beta$  (BAY11-7082: IC<sub>50</sub> = 11.2  $\mu$ M) inhibitors for 24 hours prior to transfection with gp120 and maintained with inhibitors throughout the experiment. The concentration of the inhibitor was determined based on the IC<sub>50</sub> as well as the viability of the cells, which were  $\sim 90\%$  viable at the inhibitor concentration that was used (data not shown). Expression levels of IL-6 mRNA were determined at 6 h after the termination of the transfection and IL-6 protein levels were measured at 48 h after the termination of the transfection. Both SC514 and BAY11-7082 successfully inhibited gp120-mediated expression of IL-6 mRNA by  $56.5 \pm 10.5$  percent and  $60.8 \pm 7.3$  percent, respectively (Figure 5A). Similarly, IL-6 protein levels were also reduced by  $51.3 \pm 12.4\%$  and  $34.8 \pm 13.3\%$ , respectively by SC514 and BAY11-7082 (Figure 5B).

In order to independently confirm the involvement of the NF- $\kappa$ B pathway in IL-6 induction we tested 2 siRNAs that were targeted against NF- $\kappa$ B. NF- $\kappa$ B and Rel-A specific siRNA were transfected into astrocytes 48 hours prior to gp120 transfection. IL-6 mRNA and protein levels were determined as described above. The results of these experiments are shown in Figure 5C and 5D, respectively. Both NF- $\kappa$ B and Rel-A specific siRNA blocked  $>60$  and  $>90$  percent mRNA and protein expression, respectively. These experiments confirm the results from the chemical inhibition experiments and demonstrate that the gp120-mediated increase in IL-6 expression is dependent on the NF- $\kappa$ B pathway. We also determined whether exogenous gp120 mediated IL-6 expression could be abrogated with NF- $\kappa$ B antagonists. Indeed, when pre-treated with SC514 (IKK-2 inhibitor), gp120 mediated IL-6 expression was reduced by  $80 \pm 4.13\%$  (Figure 5E).

### Small interfering RNA targeted against gp120 abrogated IL-6 expression

In this study we sought to address whether gp120 siRNA would block expression of IL-6. We designed 4 siRNA molecules (Figure 6A). These siRNA were commercially synthesized by Ambion Inc, Foster City, CA. The SVGA cells were transfected with different siRNA, 48 hour prior to gp120 transfection. Levels of IL-6 mRNA and protein expression were determined as described above. The siRNA sequences and results from these experiments are shown in Figure 5A. All 4 siRNAs inhibited IL-6 mRNA expression but the degree of inhibition was different with individual siRNAs. siRNA-1 was the most effective followed by

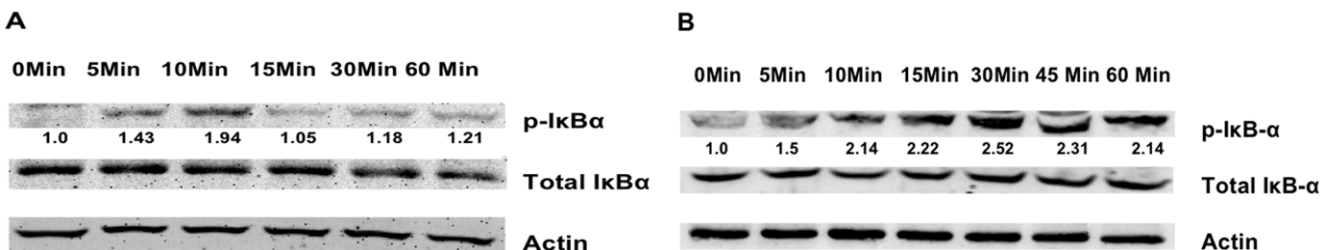

**Figure 4. gp120 mediated increase in phosphorylation of IkB- $\alpha$  in primary human fetal astrocytes.** Primary human astrocytes from two donors were treated with 20 nM gp120 IIIB, cells were collected and lysed using RIPA buffer at different times. These proteins were electrophoresed on 10% SDS gel and transferred to PVDF membrane. Antibodies against p-IkB $\alpha$ , total IkB $\alpha$  and  $\beta$ -actin were used for western blotting and membrane was read on densitometer. Values below the lanes show band intensities of the respective bands for both the donors (A & B). The increase in p-IkB- $\alpha$  was estimated by calculating the ratios of p-IkB- $\alpha$  to total IkB- $\alpha$ . Actin was used as loading control. doi:10.1371/journal.pone.0021261.g004

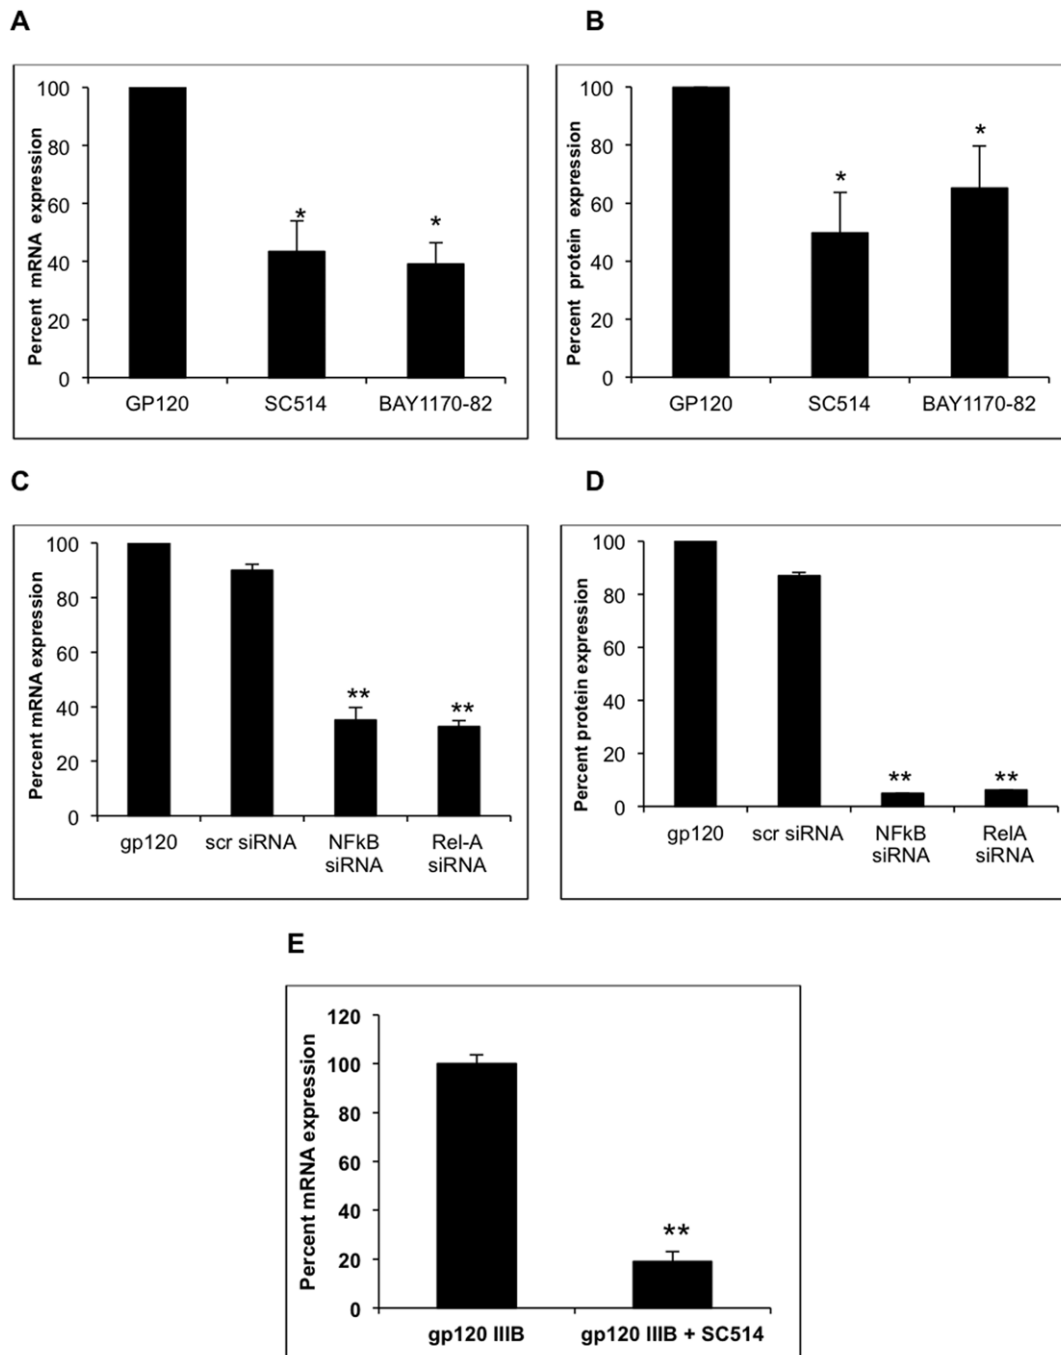

**Figure 5. Inhibition of gp120-induced IL-6 expression by chemical inhibitors and siRNA specific for the NFκB pathway.** SVGA astrocytes were treated with 10 μM SC514 (IKK-2 Inhibitor) and BAY11-7082 (IKKβ inhibitor) 24 hours prior to the transfection.  $1 \times 10^6$  SVGA astrocytes were transfected with 1 μg gp120 DNA in the presence of inhibitor, which was also maintained throughout experiments. IL-6 mRNA (A) and protein (B) was measured at 6 and 48 hours, post transfection respectively. For siRNA experiments, astrocytes were transfected with 50 nmoles of either scrambled, NFκB, or RelA siRNAs for 48 hours before gp120 transfection. IL-6 mRNA (C) and protein (D) was measured at 6 and 48 hours after gp120 transfection on cells previously transfected with siRNAs. (E) SVGA astrocytes were treated with 20 nM gp120IIIIB. 10 μM SC514 was added to SVGA 1 hour prior to gp120 treatment. IL-6 mRNA was measured after 1 hour of gp120IIIIB treatment. The mRNA is presented as relative percent mRNA expression with gp120 transfected cells as positive control. The protein concentration is presented as relative percent expression. Each bar represents mean  $\pm$  SE of 3 experiments with each experiment done in triplicates. The statistical significance was calculated using student's t test and \* and \*\* denotes p value of  $\leq 0.05$  and  $\leq 0.01$ , respectively.  
doi:10.1371/journal.pone.0021261.g005

siRNA-2, 3 and 4 in abrogating gp120-induced IL-6 RNA expression (Figure 6B). The efficacy of knockdown at the protein level was different with siRNA-4 blocking IL-6 protein expression most effectively (Figure 6C).

## Discussion

Multiple mechanisms have been proposed for HIV-1-induced neuroinflammation. In order to address the issue properly, it is

**A** small interfering RNA (siRNA) sequences targeted for gp120.

| siRNA         | Sequences*                        |
|---------------|-----------------------------------|
| gp120 siRNA-1 | 5'-UGU GAC UGA GCA CUU CAA Ctt-3' |
| gp120 siRNA-2 | 5'-UGA CAC CCU GAA GCA GAU Utt-3' |
| gp120 siRNA-3 | 5'-GCA GAU UGU GAU CAA GCU Gtt-3' |
| gp120 siRNA-4 | 5'-AGC AUA UGA UAC AGA GGU Att-3' |

\* The sequences shown above are sense strands of the siRNA

**B**

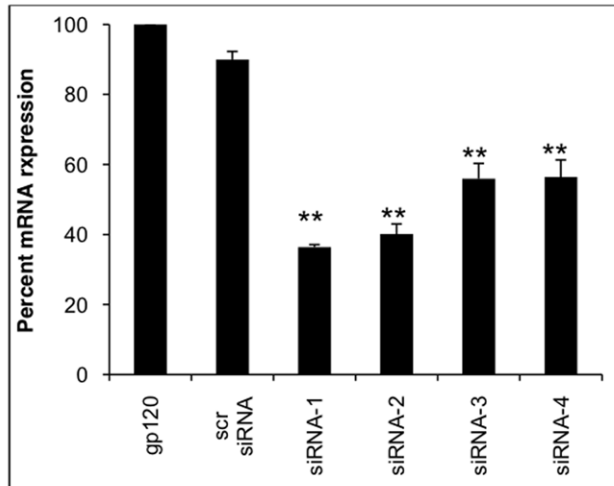

**C**

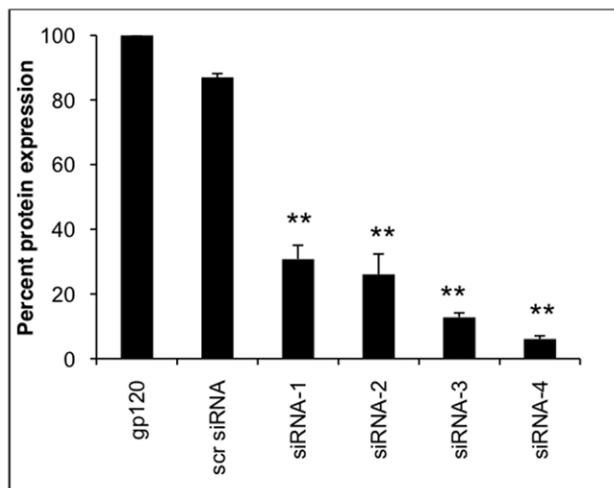

**Figure 6. Inhibition of gp120-induced IL-6 expression by gp120-specific siRNA.** Four gp120 siRNA (A) were designed using Ambion software and commercially synthesized by Ambion Inc. Only positive strand sequences are shown in the figure. Astrocytes were transfected with 50 nmoles each of scrambled or one of the 4 different siRNA for 48 hours before gp120 transfection. IL-6 mRNA (B) and protein (C) was measured at 6 and 48 hours, post-gp120 transfection. The mRNA is presented as relative percent mRNA expression with gp120 transfected cells as positive control. The protein concentration is presented as relative percent expression. Each bar represents mean  $\pm$

SE of 3 experiments with each experiment done in triplicates. The statistical significance was calculated using student's t test and \*\* denotes p value of  $\leq 0.01$ .

doi:10.1371/journal.pone.0021261.g006

critical to determine the potential mediators as well as the pathways involved in the induction or generation of such mediators. In the present study, gp120-mediated induction of IL-6 has been demonstrated to be dependent upon the NF- $\kappa$ B pathway. Interleukin-6 (IL-6) is a classical pro-inflammatory cytokine, which has been shown to be involved in response to various stimuli [37]. In our study using a human astrocyte cell line we observed that IL-6 mRNA expression reached a peak 6 h after transfection with a plasmid encoding gp120. In both types of cells IL-6 mRNA reached a peak at 1 h after the initiation of treatment with gp120 protein. These results are consistent with the previous studies by Ronaldson and Bendayan [16] who have found similar kinetics with respect to IL-1 $\beta$ , TNF- $\alpha$  and IL-6 after treatment of rat astrocytes with gp120. These results are also consistent with those obtained by Li et al, [2], who demonstrated that binding of HIV-1 to human fetal astrocytes resulted in increased production of IL-6. The authors confirmed the involvement of gp120 in mediating IL-6 over-expression by utilizing a truncated mutant virion, VSV-G pseudotype NL4-3, which was incapable of expressing gp120. The wild type VSV/NL4-3 was capable of inducing IL-6 in human fetal astrocytes, whereas the mutant failed to do so. In our experiments, as expected, there was a lag phase between the peak of mRNA and protein expressions and the results clearly demonstrated that gp120 increased the expression of IL-6 in SVGA astrocytes and in human primary astrocytes at the levels of both mRNA and protein. Our work demonstrates for the first time that gp120 induces IL-6 protein and mRNA in human astrocytes. In addition to CXCR4, astrocytes are reported to express CCR5 [28,29,30]. We showed differential expression levels of IL-6 in response to various strains of gp120. gp120IIB was used as an X4 strain of gp120, while gp120 CN54, gp120 CM and gp120Bal were used as R5 stains. Our results clearly demonstrate that in addition to the gp120IIB (X4 Strain), gp120 CN54, gp120CM and gp120Bal significantly altered IL-6 expression to various extents.

Using siRNA targeted against gp120, as well as transfections with empty vector, we have definitively shown that the increase in IL-6 observed is due to the presence of gp120. Interestingly, we observed differential regulation of IL-6 mRNA and protein expression after siRNA knockdown of gp120. Although gp120 siRNA 1 was the most effective siRNA in blocking expression of IL-6 mRNA, gp120 siRNA 4 was the most effective siRNA in blocking IL-6 expression at the level of protein. The reason for this discrepancy could be attributed to the fact that mRNA expression was monitored within 6 hrs after transfection whereas protein was monitored 48 hours after transfection and these siRNAs might have required more than 6 hour to exhibit full effect.

Nuclear Factor kappa B (NF- $\kappa$ B) has been shown to be involved in a wide array of cellular responses. The pathways in which NF- $\kappa$ B has been determined to be a key mediator include cell death, apoptosis and inflammation [32,33,34]. In rat astrocytes, induction of both MCP-1 and MCP-3 has been shown to be dependent upon NF- $\kappa$ B [38]. Ronaldson, et al. showed that pretreatment of astrocytes with a peptide inhibitor of NF- $\kappa$ B, SN-50 dramatically reduced the level of TNF- $\alpha$  elicited by gp120 treatment [29]. IL-6 production has also been found to be mediated through the NF- $\kappa$ B pathway in patients with rheumatoid arthritis [39], retinal microglia [40], lung pericytes [41] and mice splenocytes treated with LPS [42]. In our study, we sought to address whether NF- $\kappa$ B

activation is involved in mediating gp120-induced IL-6 expression. We demonstrated that there is increased phosphorylation of I $\kappa$ B $\alpha$  along with significant translocation of p50 from the cytoplasm to the nucleus that is dependent upon gp120. This is similar to a report by Saha et al. [43] that demonstrates that gp120 activates the NF- $\kappa$ B pathway and leads to nuclear translocation of p50. Results obtained from pharmacological inhibitors and siRNA approach also confirmed that induction of IL-6 expression was dependent upon the NF- $\kappa$ B pathway. Taken together, the evidence presented in this paper along with results from other laboratories provides strong support for the involvement of NF- $\kappa$ B in mediating gp120 induction of IL-6. Along with its role in inducing inflammatory cytokines, NF- $\kappa$ B has also been demonstrated to be involved in regulating the responses to oxidative stress in astrocytes [44,45]. Oxidative stress has been widely demonstrated as an important mechanism through which gp120 affects astrocytes [46]. Thus, activation of NF- $\kappa$ B by gp120 could be an important mechanism by which the cell protects itself from the oxidative stress associated with viral infection of the CNS.

Our data on the induction of IL-6 by gp120 are consistent with previously reported results. It should be noted that the results that we have observed using the two models of astrocyte exposure to gp120 (i.e. intracellular production of gp120 vs. extracellular administration of the protein) are somewhat different from each other in terms of kinetics and levels of IL-6 induction observed. These differences can be attributed to 2 differences in the models; one model utilizes extracellular exposure of primary astrocytes and the other model utilizes transfection of an immortalized cell line. We have utilized both models in order to determine the effects of gp120 on astrocytes regardless of the route of exposure. Our results not only confirm what other laboratories have reported with regard to extracellular exposure of astrocytes to gp120, but we have also shown that non-productive infection of astrocytes by HIV-1 may be a significant and persistent source of IL-6 in the CNS. It is important to note that the work presented here is the first demonstration that IL-6 is induced in human astrocytes in response to gp120. All previous reports in the literature have used either rat astrocytes or human mixed glial cultures.

This is an especially important finding because previously reported evidence suggests that IL-6 may be involved in the regulation of other cytokines such as TNF- $\alpha$  and IL-1 $\beta$  [25]. Taken together, this suggests that gp120-mediated activation of the NF- $\kappa$ B pathway may be critical therapeutic target for the treatment of HIV-related neuroinflammation. One approach that could be explored would be to try to interfere with the interaction between NF- $\kappa$ B and its binding site in the IL-6 promoter in astrocytes. Recent advances suggest that small RNAs or miRNA might be a useful tool for silencing promoters/enhancers [47,48,49], and such an approach might be applied to the IL-6 promoter in astrocytes. Also, recently Kim et al. have employed a novel approach to target specific cell types using antibody-based strategies [50]. Using their approach they were able to efficiently target delivery of siRNA specifically to T-cells via the CD67 receptor. Similarly, Wu et al. used microRNA delivery to astrocyte specific promoter as a tool for cancer therapy [51]. Such an approach might be further exploited in astrocytes by targeting these cells using GFAP to deliver siRNA/miRNA for NF- $\kappa$ B or IL-6 promoter. As successful antiretroviral treatment has extended the lifespan of those infected with HIV, the importance of finding novel treatments for the HIV-associated morbidities caused by chronic inflammation and oxidative stress, such as HAND, has become increasingly critical. Identification of a critical therapeutic target, as has been presented in this study, is an important step towards the development of more effective therapeutic regimens for neuroAIDS.

## Materials and Methods

### Cells and Reagents

All studies were reviewed and approved by Institutional Biosafety Committee and Institutional Review Board of UMKC. SVGA is a clone of a human fetal astrocyte cell line (SVG) [52] and was maintained in DMEM media supplemented with 10% FBS and 1% gentamicin at 37°C in 5% CO<sub>2</sub> environment. Human fetal astrocytes were obtained from aborted fetal brain tissue and were grown in DMEM media supplemented with 10% FBS and 1% gentamicin at 37°C in 5% CO<sub>2</sub> environment. The growing cells were >98% astrocytes as defined by GFAP staining (Data not shown). Lipofectamine<sup>TM</sup> 2000, and NF- $\kappa$ B inhibitors (IKK-2; SC514 and IKK- $\beta$ ; BAY1170-82) were obtained from Invitrogen Inc. (Carlsbad, CA) and Calbiochem (EMD Biosciences Inc., La Jolla, CA), respectively. The HIVgp120 plasmid, pSyn gp120 JR-FL (Catalog # 4598), recombinant HIV-1 IIB gp120 (Catalog # 11784), HIV-1 CN54 gp120 (Catalog # 7749), recombinant HIV-1BaL gp120 (Catalog # 4961), HIV-1 gp120 Monoclonal (2G12) (Catalog # 1476) and HIV-1 gp120 CM (Catalog # 2968) were obtained from the NIH AIDS Research and Reference Reagent Program. Monomeric gp120 SF162 and trimeric forms of gp140 SF162 were prepared as discussed earlier [53,54]. The heat-inactivated gp120 was prepared by heating gp120 at 65°C for 30 minutes. Negative control samples with gp120-immune complex treatments were also included. Monoclonal antibody gp120 (2G12) was mixed with gp120IIB for 30 minutes in 10:1 proportion to make immune complex prior to addition to the cells. Small interfering RNAs (siRNA) targeted against gp120 were designed using Ambion software and then synthesized by Ambion Inc. (Applied Biosystems, Foster City, CA). Pre-designed siRNA for NF- $\kappa$ B (P/N AM51331; id 5213) and Rel-A (P/N 4390824; id s11914) were also purchased from Ambion Inc. (Applied Biosystems). Specific antibodies for p50, lamin-B and  $\beta$ -tubulin were obtained from Santa Cruz Biotechnologies (Santa Cruz, CA).

### Transfection

The SVGA cells were transfected with Lipofectamine<sup>TM</sup> 2000 as recommended by the manufacturer. Briefly,  $1 \times 10^6$  cells were transiently transfected with 1  $\mu$ g pSyn gp120 JR-FL for a period of 5 h in serum-free medium. The transfection was terminated after 5 h by the addition of complete media. The cells were harvested and total RNA was extracted using RNeasy kit from Qiagen (Valencia, CA). Cytokine expression was measured after 6, 12, 24, 48 and 72 h after the transfection was terminated. For NF- $\kappa$ B inhibition experiments, the cells were treated with 10  $\mu$ M antagonists for 24 hours prior to the start of transfection. siRNA transfections were performed using Lipofectamine<sup>TM</sup> 2000 48 hrs prior to gp120 transfection. Briefly, 50 nmoles of siRNA was transfected into each well containing  $1 \times 10^6$  astrocytes in serum-free media. The transfection media was replaced after 24 hours with the fresh DMEM containing 10% FBS and the cells were incubated for 24 hours. The cells were then transiently transfected with gp120 and the cytokine levels were determined as described below. Controls in these experiments included mock transfection with equimolar empty plasmid and scrambled siRNA to compare siRNA transfected cells.

### Electroporation of primary astrocytes for transfection of gp120

Transfections were performed as described in the manufacturer's protocol. Briefly,  $8 \times 10^6$  cells were mixed with the transfection reagent supplied with the kit (Amaxa rat astrocyte, VPI-1006) and the cells were placed in a cuvette. 5  $\mu$ g of gp120 plasmid was

added to the cells and electroporation was performed using a unique pulse program (T-020) for rat astrocyte cells which was optimized for human astrocytes. The cells were allowed to recover for 30 minutes with 500  $\mu$ l DMEM media in the cuvette and further diluted with DMEM followed by 30 minute incubation. With the optimum conditions, the transfection efficiency was found to be 60–70% as measured with GFP expression (Data not shown) and the cell viability ranged from 45–60%.  $2 \times 10^6$  cells were plated per well.

### Real time RT-PCR and IL-6 protein assay

The cells were harvested and total RNA was extracted using RNeasy kit from Qiagen (Valencia, CA) at 6, 12, 24, 48 and 72 hours after the transfection was terminated. IL-6 mRNA was measured in Real-Time RT-PCR using forward primer (5' GGT ACA TCC TCG ACG GCA TC 3'), reverse primer (5' CCA GTG CCT CTT TGC TGC TT 3'), and probe (5' FAM CAG CCC TGA GAA AGG AGA CAT GTA ACA GGA AA-3' BHQ) in a Bio-Rad iCycler. The reaction conditions were as follows: reverse transcription at 50°C for 30 min, 95°C for 15 min and 50 cycles at 95°C for 15 sec and 57.5°C for 1 min. To normalize gene expression, HPRT was amplified in a separate reaction using the following primers and conditions: forward primer: 5'GCT TTC CTT GGT CAG GCA GTA 3'; reverse primer: 5' CCA ACA CTT CGT GGR GTC CTT T 3'; reverse transcription at 50°C for 30 m, 95°C for 15 m and 45 cycles at 95°C for 15 sec and 55°C for 30 sec. The data was analyzed using the equation  $2^{-\Delta\Delta CT}$  method as described previously [55]. Cell culture supernatants were collected at different times after transfection and IL-6 protein concentration was determined using a Bio-Plex System (Life Science Research, Hercules, CA). The protein expression was measured by comparing the values with the 5PL-standard curve using Bio-Plex Manager 5.0 software.

### Western blotting

SVGA cells were harvested at given time points and nuclear and cytoplasmic extracts were prepared using the NE-PER Nuclear extraction kit (Pierce, Rockford, IL) as per the manufacturer's directions. The cells were lysed with RIPA Buffer (Boston BioProducts, Ashland, MA), followed by homogenization for

15 sec and centrifugation at 12000 RPM for 5 minutes to eliminate cell debris. Protein concentrations were estimated using Pierce BCA protein assay (Pierce). 20  $\mu$ g of protein was loaded on a 12% acrylamide gel and electrophoresed for at 90 V for 120 min and transferred to a PVDF membrane at 350 mA for 70 min. Phosphorylated-I $\kappa$ B $\alpha$  and total I $\kappa$ B $\alpha$  were detected using Phospho-I $\kappa$ B- $\alpha$  (Ser32) (14D4) (1:1000) and I $\kappa$ B- $\alpha$  (#9242) (1:1000) primary antibodies (Cell Signaling, Danvers, MA), respectively. The band intensities were normalized using total I $\kappa$ B $\alpha$ . The expression of p50 was detected using NF- $\kappa$ B p50 (H-119) (1:1000) primary antibody (Santa Cruz Biotechnology, Inc.) and expression was normalized using Lamin-B as an endogenous control for the nuclear extracts and  $\beta$ -tubulin as an endogenous control for the cytoplasmic extracts. Lamin B and  $\beta$ -tubulin were detected using Lamin B (C-20) (1:1500) and  $\beta$  Tubulin (D-10) (1:1500) primary antibodies respectively (Santa Cruz Biotechnology, Inc.). HRP conjugated secondary antibodies were used to detect the primary antibodies and detection of protein bands was performed using BM Chemiluminescence Western Blotting Substrate (POD) (Roche Applied Sciences, Indianapolis, IN). Quantification was done using spot densitometry with FluorChem HD2 software (Alpha Innotech, San Leandro, CA).

### Statistical analysis

Data are expressed in means  $\pm$  SE of 3 experiments with each experiment done in triplicates. The statistical significance was calculated in student's t test and a p value < 0.05 was considered significant.

### Acknowledgments

We thank Dr. Avindra Nath for providing us SVGA cell line. We also thank Dr. Ashok Chauhan for helping us with standardization siRNA experiment.

### Author Contributions

Conceived and designed the experiments: AK SB HKB DPS. Performed the experiments: AS ASV KHP RN VRA. Analyzed the data: PSS SC. Wrote the paper: AS PS AK. Involved in optimization of techniques: ASV SC. Contributed with experiments regarding effect of trimeric gp140: LS.

### References

- Chen Y, Swanson RA (2003) Astrocytes and brain injury. *J Cereb Blood Flow Metab* 23: 137–149.
- Li J, Bentsman G, Potash MJ, Volsky DJ (2007) Human immunodeficiency virus type 1 efficiently binds to human fetal astrocytes and induces neuroinflammatory responses independent of infection. *BMC Neurosci* 8: 31.
- Panicar K, Norenberg MD (2005) Astrocytes in cerebral ischemic injury: morphological and general considerations. *Glia* 50: 287–298.
- Minagar A, Shapshak P, Fujimura R, Ownby R, Heyes M, et al. (2002) The role of macrophage/microglia and astrocytes in the pathogenesis of three neurologic disorders: HIV-associated dementia, Alzheimer disease, and multiple sclerosis. *J Neurol Sci* 202: 13–23.
- Togo T, Akiyama H, Kondo H, Ikeda K, Kato M, et al. (2000) Expression of CD40 in the brain of Alzheimer's disease and other neurological diseases. *Brain Res* 885: 117–121.
- Nukuna A, Gendelman HE, Limoges J, Rasmussen J, Poluektova L, et al. (2004) Levels of human immunodeficiency virus type 1 (HIV-1) replication in macrophages determines the severity of murine HIV-1 encephalitis. *J Neurovirol* 10 Suppl 1: 82–90.
- Hauser KF, El-Hage N, Buch S, Nath A, Tyor WR, et al. (2006) Impact of opiate-HIV-1 interactions on neurotoxic signaling. *J Neuroimmune Pharmacol* 1: 98–105.
- Bansal AK, Mactutus CF, Nath A, Maragos W, Hauser KF, et al. (2000) Neurotoxicity of HIV-1 proteins gp120 and Tat in the rat striatum. *Brain Res* 879: 42–49.
- Nath A, Anderson C, Jones M, Maragos W, Booze R, et al. (2000) Neurotoxicity and dysfunction of dopaminergic systems associated with AIDS dementia. *J Psychopharmacol* 14: 222–227.
- Iskander S, Walsh KA, Hammond RR (2004) Human CNS cultures exposed to HIV-1 gp120 reproduce dendritic injuries of HIV-1-associated dementia. *J Neuroinflammation* 1: 7.
- Wallace DR, Dodson S, Nath A, Booze RM (2006) Estrogen attenuates gp120- and tat1-72-induced oxidative stress and prevents loss of dopamine transporter function. *Synapse* 59: 51–60.
- Agrawal L, Louboutin JP, Marusch E, Reyes BA, Van Bockstaele EJ, et al. Dopaminergic neurotoxicity of HIV-1 gp120: reactive oxygen species as signaling intermediates. *Brain Res* 1306: 116–130.
- Ronaldson PT, Bendayan R (2008) HIV-1 viral envelope glycoprotein gp120 produces oxidative stress and regulates the functional expression of multidrug resistance protein-1 (Mrp1) in glial cells. *J Neurochem* 106: 1298–1313.
- Louboutin JP, Reyes BA, Agrawal L, Van Bockstaele EJ, Strayer DS (2010) HIV-1 gp120-induced neuroinflammation: relationship to neuron loss and protection by rSV40-delivered antioxidant enzymes. *Exp Neurol* 221: 231–245.
- Viviani B, Gardoni F, Bartesaghi S, Corsini E, Facchi A, et al. (2006) Interleukin-1 beta released by gp120 drives neural death through tyrosine phosphorylation and trafficking of NMDA receptors. *J Biol Chem* 281: 30212–30222.
- Ronaldson PT, Bendayan R (2006) HIV-1 viral envelope glycoprotein gp120 triggers an inflammatory response in cultured rat astrocytes and regulates the functional expression of P-glycoprotein. *Mol Pharmacol* 70: 1087–1098.
- McLoughlin RM, Witowski J, Robson RL, Wilkinson TS, Hurst SM, et al. (2003) Interplay between IFN-gamma and IL-6 signaling governs neutrophil trafficking and apoptosis during acute inflammation. *J Clin Invest* 112: 598–607.
- Becker C, Fantini MC, Schramm C, Lehr HA, Wirtz S, et al. (2004) TGF-beta suppresses tumor progression in colon cancer by inhibition of IL-6 trans-signaling. *Immunity* 21: 491–501.
- Eggert D, Dash PK, Serradij N, Dong CZ, Clayette P, et al. (2009) Development of a platelet-activating factor antagonist for HIV-1 associated neurocognitive disorders. *J Neuroimmunol* 213: 47–59.



20. Mogi M, Harada M, Kondo T, Riederer P, Inagaki H, et al. (1994) Interleukin-1 beta, interleukin-6, epidermal growth factor and transforming growth factor-alpha are elevated in the brain from parkinsonian patients. *Neurosci Lett* 180: 147–150.
21. Maccioni RB, Rojo LE, Fernandez JA, Kuljis RO (2009) The role of neuroimmunomodulation in Alzheimer's disease. *Ann N Y Acad Sci* 1153: 240–246.
22. Breen EC, Rezaei AR, Nakajima K, Beall GN, Mitsuyasu RT, et al. (1990) Infection with HIV is associated with elevated IL-6 levels and production. *J Immunol* 144: 480–484.
23. Yeung MC, Pulliam L, Lau AS (1995) The HIV envelope protein gp120 is toxic to human brain-cell cultures through the induction of interleukin-6 and tumor necrosis factor-alpha. *AIDS* 9: 137–143.
24. Kong LY, Wilson BC, McMillan MK, Bing G, Hudson PM, et al. (1996) The effects of the HIV-1 envelope protein gp120 on the production of nitric oxide and proinflammatory cytokines in mixed glial cell cultures. *Cell Immunol* 172: 77–83.
25. Schoeniger-Skinner DK, Ledebner A, Frank MG, Milligan ED, Poole S, et al. (2007) Interleukin-6 mediates low-threshold mechanical allodynia induced by intrathecal HIV-1 envelope glycoprotein gp120. *Brain Behav Immun* 21: 660–667.
26. Lavi E, Kolson DL, Ulrich AM, Fu L, Gonzalez-Scarano F (1998) Chemokine receptors in the human brain and their relationship to HIV infection. *J Neurovirol* 4: 301–311.
27. Hesselgesser J, Horuk R (1999) Chemokine and chemokine receptor expression in the central nervous system. *J Neurovirol* 5: 13–26.
28. Avdoshina V, Biggio F, Palchik G, Campbell LA, Mochetti I (2010) Morphine induces the release of CCL5 from astrocytes: potential neuroprotective mechanism against the HIV protein gp120. *Glia* 58: 1630–1639.
29. Ronaldson PT, Ashraf T, Bendayan R (2010) Regulation of multidrug resistance protein 1 by tumor necrosis factor alpha in cultured glial cells: involvement of nuclear factor-kappaB and c-Jun N-terminal kinase signaling pathways. *Mol Pharmacol* 77: 644–659.
30. Thompson KA, Churchill MJ, Gorry PR, Sterjovski J, Oelrichs RB, et al. (2004) Astrocyte specific viral strains in HIV dementia. *Ann Neurol* 56: 873–877.
31. Grundner C, Li Y, Louder M, Mascola J, Yang X, et al. (2005) Analysis of the neutralizing antibody response elicited in rabbits by repeated inoculation with trimeric HIV-1 envelope glycoproteins. *Virology* 331: 33–46.
32. Beg AA, Baltimore D (1996) An essential role for NF-kappaB in preventing TNF-alpha-induced cell death. *Science* 274: 782–784.
33. Saile B, Matthes N, El Armouche H, Neubauer K, Ramadori G (2001) The bcl, NFkappaB and p53/p21WAF1 systems are involved in spontaneous apoptosis and in the anti-apoptotic effect of TGF-beta or TNF-alpha on activated hepatic stellate cells. *Eur J Cell Biol* 80: 554–561.
34. Siebenlist U, Franzoso G, Brown K (1994) Structure, regulation and function of NF-kappa B. *Annu Rev Cell Biol* 10: 405–455.
35. Kishore N, Sommers C, Mathialagan S, Guzova J, Yao M, et al. (2003) A selective IKK-2 inhibitor blocks NF-kappa B-dependent gene expression in interleukin-1 beta-stimulated synovial fibroblasts. *J Biol Chem* 278: 32861–32871.
36. Garcia MG, Alaniz L, Lopes EC, Blanco G, Hajos SE, et al. (2005) Inhibition of NF-kappaB activity by BAY 11-7082 increases apoptosis in multidrug resistant leukemic T-cell lines. *Leuk Res* 29: 1425–1434.
37. Akira S, Kishimoto T (1992) IL-6 and NF-IL6 in acute-phase response and viral infection. *Immunol Rev* 127: 25–50.
38. Thompson WL, Van Eldik LJ (2009) Inflammatory cytokines stimulate the chemokines CCL2/MCP-1 and CCL7/MCP-3 through NFkB and MAPK dependent pathways in rat astrocytes [corrected]. *Brain Res* 1287: 47–57.
39. Lazzzerini PE, Lorenzini S, Selvi E, Capecchi PL, Chindamo D, et al. (2007) Simvastatin inhibits cytokine production and nuclear factor-kB activation in interleukin 1beta-stimulated synoviocytes from rheumatoid arthritis patients. *Clin Exp Rheumatol* 25: 696–700.
40. Wang AL, Li Z, Yuan M, Yu AC, Zhu X, et al. (2007) Sinomenine inhibits activation of rat retinal microglia induced by advanced glycation end products. *Int Immunopharmacol* 7: 1552–1558.
41. Edelman DA, Jiang Y, Tyburski JG, Wilson RF, Steffes CP (2007) Cytokine production in lipopolysaccharide-exposed rat lung pericytes. *J Trauma* 62: 89–93.
42. Zhang X, Song Y, Ci X, An N, Ju Y, et al. (2008) Ivermectin inhibits LPS-induced production of inflammatory cytokines and improves LPS-induced survival in mice. *Inflamm Res* 57: 524–529.
43. Saha RN, Pahan K (2003) Tumor necrosis factor-alpha at the crossroads of neuronal life and death during HIV-associated dementia. *J Neurochem* 86: 1057–1071.
44. Bowie A, O'Neill LA (2000) Oxidative stress and nuclear factor-kappaB activation: a reassessment of the evidence in the light of recent discoveries. *Biochem Pharmacol* 59: 13–23.
45. Sinke AP, Jayakumar AR, Panickar KS, Moriyama M, Reddy PV, et al. (2008) NFkappaB in the mechanism of ammonia-induced astrocyte swelling in culture. *J Neurochem* 106: 2302–2311.
46. Visalli V, Muscoli C, Sacco I, Sculco F, Palma E, et al. (2007) N-acetylcysteine prevents HIV gp 120-related damage of human cultured astrocytes: correlation with glutamine synthase dysfunction. *BMC Neurosci* 8: 106.
47. Younger ST, Corey DR (2011) Transcriptional gene silencing in mammalian cells by miRNA mimics that target gene promoters. *Nucleic Acids Res*.
48. Mette MF, Aufsatz W, van der Winden J, Matzke MA, Matzke AJ (2000) Transcriptional silencing and promoter methylation triggered by double-stranded RNA. *EMBO J* 19: 5194–5201.
49. Hawkins PG, Santoso S, Adams C, Anest V, Morris KV (2009) Promoter targeted small RNAs induce long-term transcriptional gene silencing in human cells. *Nucleic Acids Res* 37: 2984–2995.
50. Kim SS, Subramanya S, Peer D, Shimaoka M, Shankar P (2011) Antibody-mediated delivery of siRNAs for anti-HIV therapy. *Methods Mol Biol* 721: 339–353.
51. Wu C, Lin J, Hong M, Choudhury Y, Balani P, et al. (2009) Combinatorial control of suicide gene expression by tissue-specific promoter and microRNA regulation for cancer therapy. *Mol Ther* 17: 2058–2066.
52. Major EO, Miller AE, Mourrain P, Traub RG, de Widt E, et al. (1985) Establishment of a line of human fetal glial cells that supports JC virus multiplication. *Proc Natl Acad Sci U S A* 82: 1257–1261.
53. Sellhorn G, Caldwell Z, Mineart C, Stamatatos L (2009) Improving the expression of recombinant soluble HIV Envelope glycoproteins using pseudo-stable transient transfection. *Vaccine* 28: 430–436.
54. Sather DN, Armann J, Ching LK, Mavrantoni A, Sellhorn G, et al. (2009) Factors associated with the development of cross-reactive neutralizing antibodies during human immunodeficiency virus type 1 infection. *Journal of virology* 83: 757–769.
55. Livak KJ, Schmittgen TD (2001) Analysis of relative gene expression data using real-time quantitative PCR and the 2<sup>(-Delta Delta C(T))</sup> Method. *Methods* 25: 402–408.
